# Supplementary material for: Microwave-Assisted Synthesis of Pd Nanoparticles into Wood Block (Pd@wood) as Efficient Catalyst for 4-Nitrophenol and Cr(VI) Reduction
Source: MDPI journal article supplement (doi:10.3390/nano13172491), 2023-09-04
Supplement: s1 [file s1]

## Supporting Information

### **Microwave-assisted Synthesis of Pd Nanoparticles into Wood Block (Pd@wood) as Efficient Catalyst for 4-nitrophenol and Cr(VI) Reduction**

**Zhao Zhang<sup>1</sup>, Arnaud Besserer<sup>2</sup>, Christophe Rose<sup>3</sup>, Nicolas Brosse<sup>2</sup>, Vincent Terrasson<sup>1,\*</sup>, Erwann Guénin<sup>1,\*</sup>**

<sup>1</sup> Université de Technologie de Compiègne, ESCOM, TIMR (Integrated Transformations of Renewable Matter), Centre de Recherche Royallieu-CS 60 319-60 203 Compiègne Cedex, France.

<sup>2</sup> Université de Lorraine, INRAE, LERMAB, F-54000 Nancy, France.

<sup>3</sup> Centre INRAE-Grand Est-Nancy, UMR SYLVA-SILVATECH pole IM3, 54280 Champenoux, France.

\* Correspondence: Erwann Guénin, E-mail: [erwann.guenin@utc.fr](mailto:erwann.guenin@utc.fr); Tel.: +33-344-234-584; Vincent Terrasson, E-mail: [v.terrasson@escom.fr](mailto:v.terrasson@escom.fr)

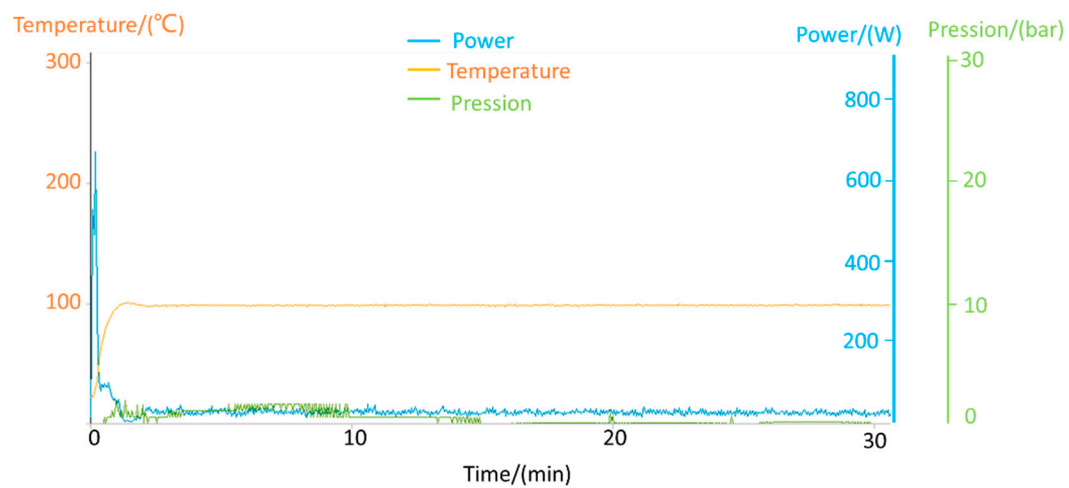

**Figure S1.** The power, temperature and pressure of the whole process in the Microwave Synthesis Reactor to synthesize the Pd@wood catalyst.

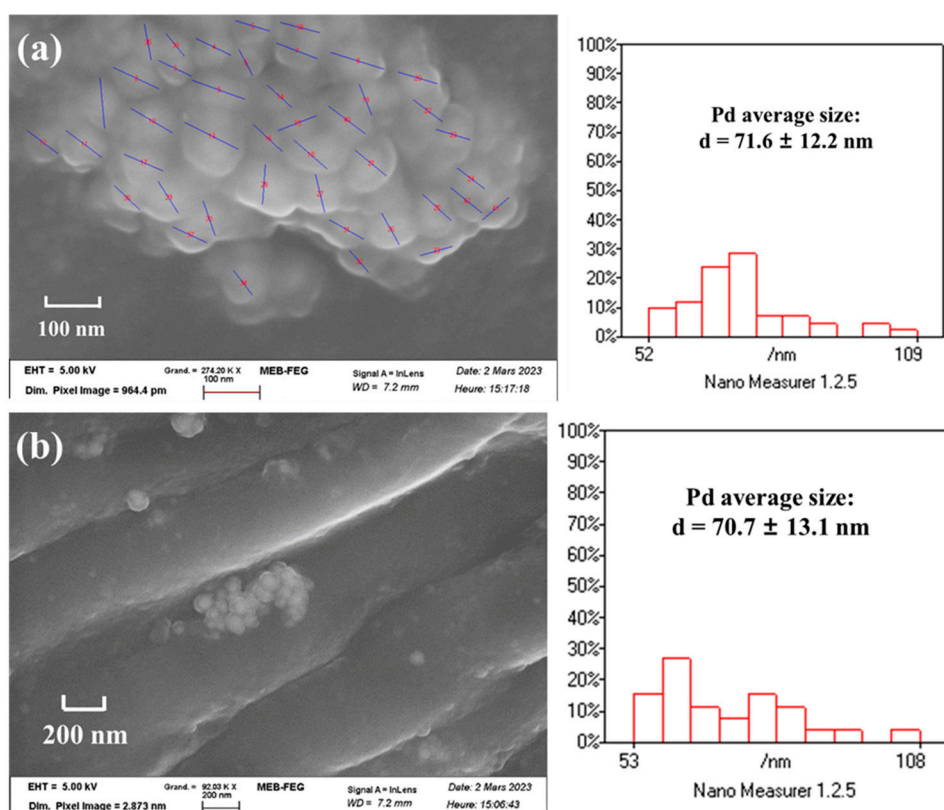

**Figure S2.** The size distribution of Pd nanoparticles.

**Table S1.** The size distribution, mean size, amount and the frequencies of Pd nanoparticles in Figure S2(a).

| Distr./nm  | Mean/nm | Amount | Freq.  |
|------------|---------|--------|--------|
| 52-57.7    | 54.85   | 4      | 9.52%  |
| 57.7-63.4  | 60.55   | 5      | 11.90% |
| 63.4-69.1  | 66.25   | 10     | 23.81% |
| 69.1-74.8  | 71.95   | 12     | 28.57% |
| 74.8-80.5  | 77.65   | 3      | 7.14%  |
| 80.5-86.2  | 83.35   | 3      | 7.14%  |
| 86.2-91.8  | 89.05   | 2      | 4.76%  |
| 91.8-97.6  | 94.75   | 0      | 0.00%  |
| 97.6-103.3 | 100.45  | 2      | 4.76%  |
| 103.3-109  | 106.15  | 1      | 2.38%  |

**Table S2.** The size distribution, mean size, amount and the frequencies of Pd nanoparticles in Figure S2(b).

| Distr./nm | Mean/nm | Amount | Freq.  |
|-----------|---------|--------|--------|
| 53-58.5   | 55.75   | 4      | 15.38% |
| 58.5-64   | 61.25   | 7      | 26.92% |
| 64-69.5   | 66.75   | 3      | 11.54% |
| 69.5-75   | 72.25   | 2      | 7.69%  |
| 75-80.5   | 77.75   | 4      | 15.38% |
| 80.5-86   | 83.25   | 3      | 11.54% |
| 86-91.5   | 88.75   | 1      | 3.85%  |
| 91.5-97   | 94.25   | 1      | 3.85%  |
| 97-102.5  | 99.75   | 0      | 0.00%  |
| 102.5-108 | 105.25  | 1      | 3.85%  |

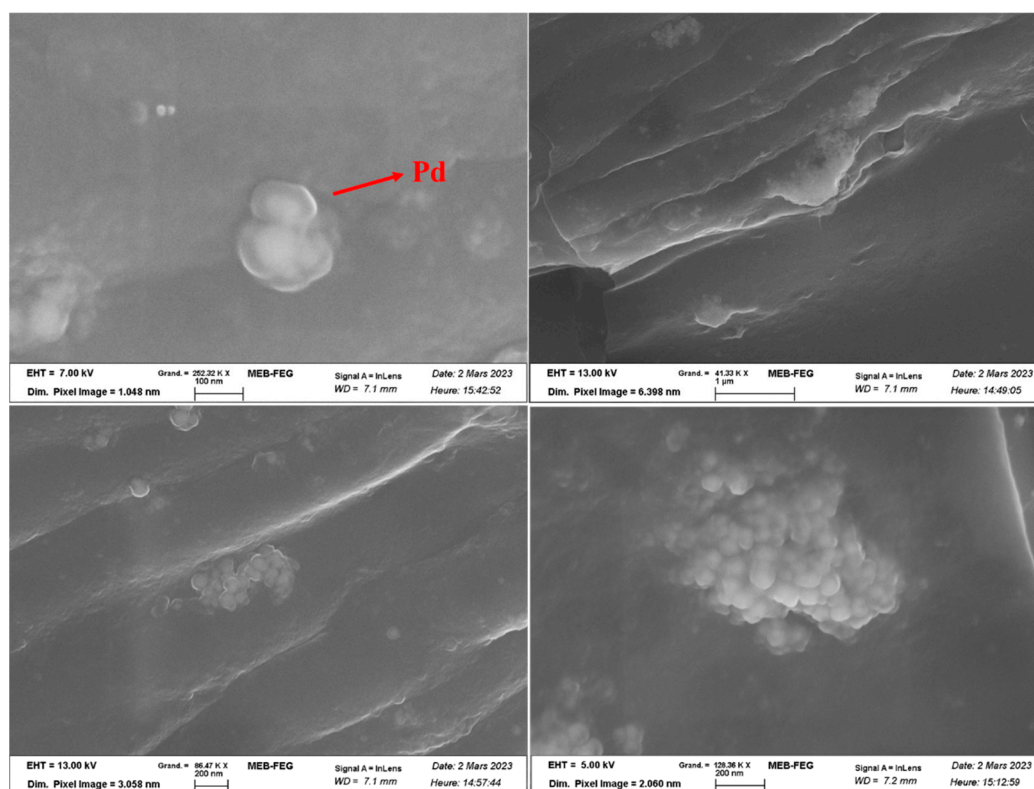

**Figure S3.** SEM images of the internal structure of Pd@wood catalyst.

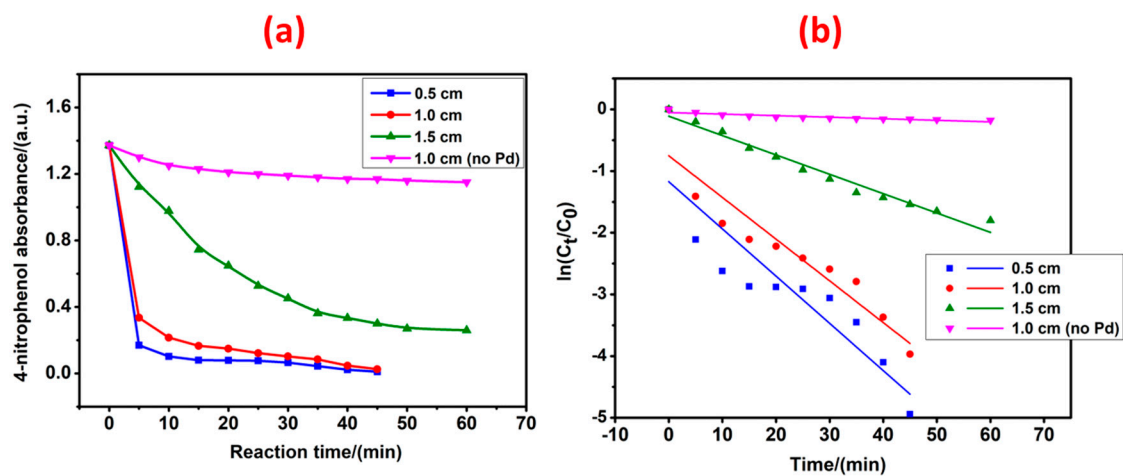

**Figure S4.** (a): Catalytic reduction of 4-nitrophenol by treated with wood catalysts of three different lengths (0.5, 1.0, 1.5 cm), and adsorption of 4-nitrophenol by 1.0 cm wood without Pd. (b): Kinetic curves corresponding plots of  $\ln(C_t/C_0)$  versus reaction time.

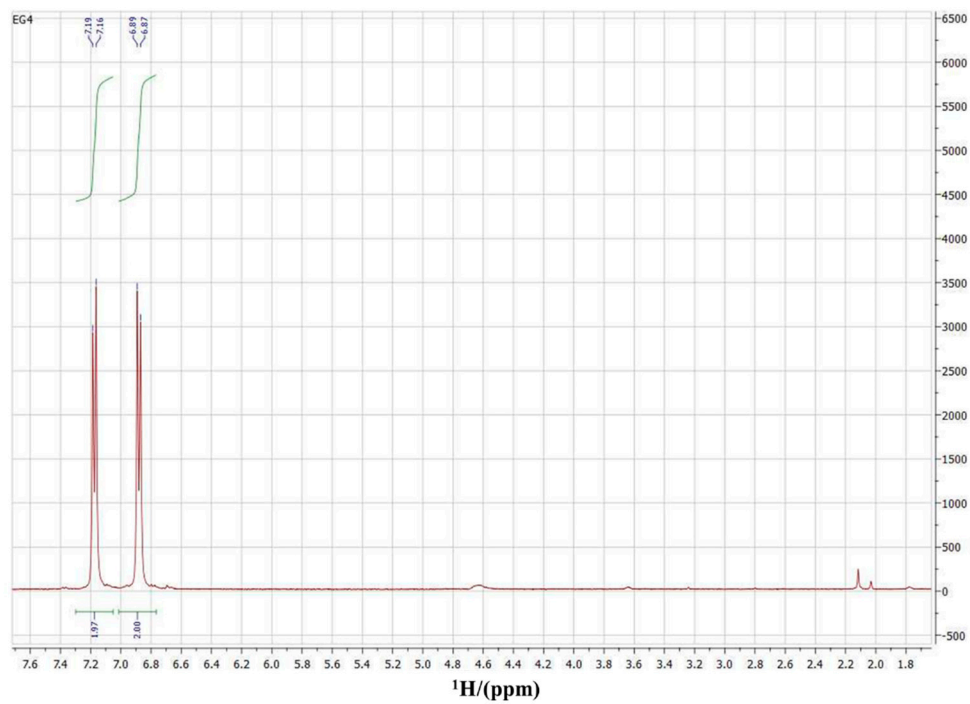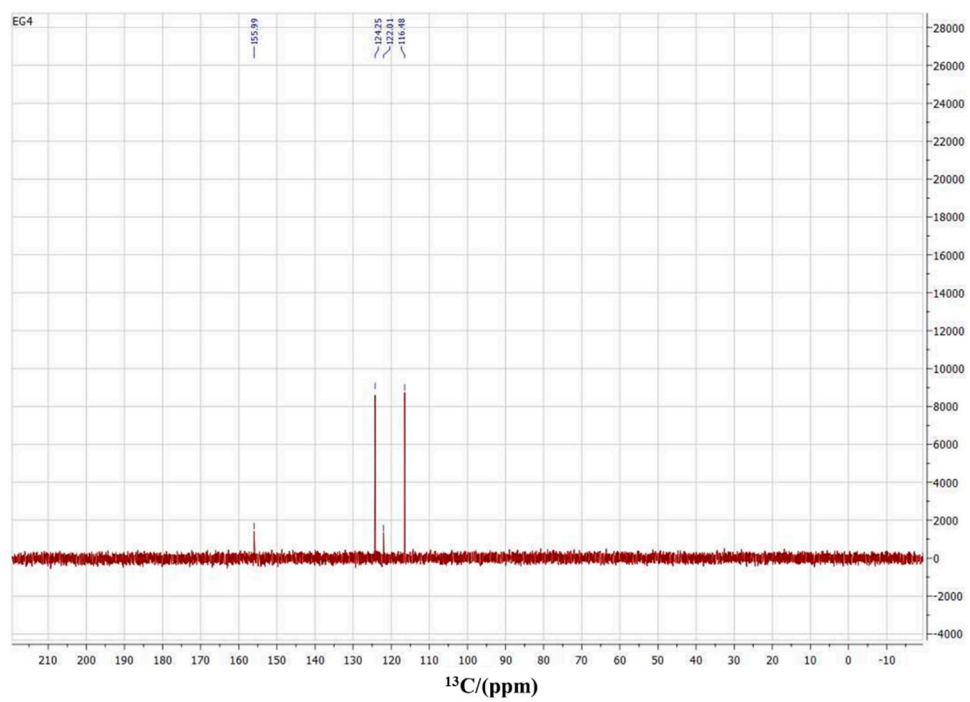

**Figure S5.**  $^1\text{H}$  and  $^{13}\text{C}$  NMR spectrum of 4-aminophenol.
